# Supplementary material
Source: PubMed Central journal article supplement (PMC2707217)

## **SUPPLEMENTARY FIGURE**

### **S1. Promoter regions of three growth associated genes contain putative NFAT sites and dysregulation of these genes during brain developmental in NFAT-3 null mice.**

(A) A depiction of the CAP-23, SCG-10 and L1cam promoter regions showing putative NFAT binding sites. (B) CAP-23 expression is higher in embryonic NFAT-3 null brains. Q-PCR was performed for CAP-23 mRNA levels in NFAT-3 null and wild-type mice from E10, E13, P1, P3, P7 and adult brains. (C) SCG-10 expression is higher in embryonic and post-natal brains of NFAT-3 null mice. Q-PCR was performed for SCG-10 levels in null and wild-type mice. (D) L1cam expression is higher in embryonic and post-natal brains of NFAT-3 null mice. Q-PCR was performed for L1cam in null and wild-type mice. Q-PCR levels for (B), (C), and (D) were all normalized to  $\beta$ -actin mRNA levels.

# Supplementary Figure 1

A

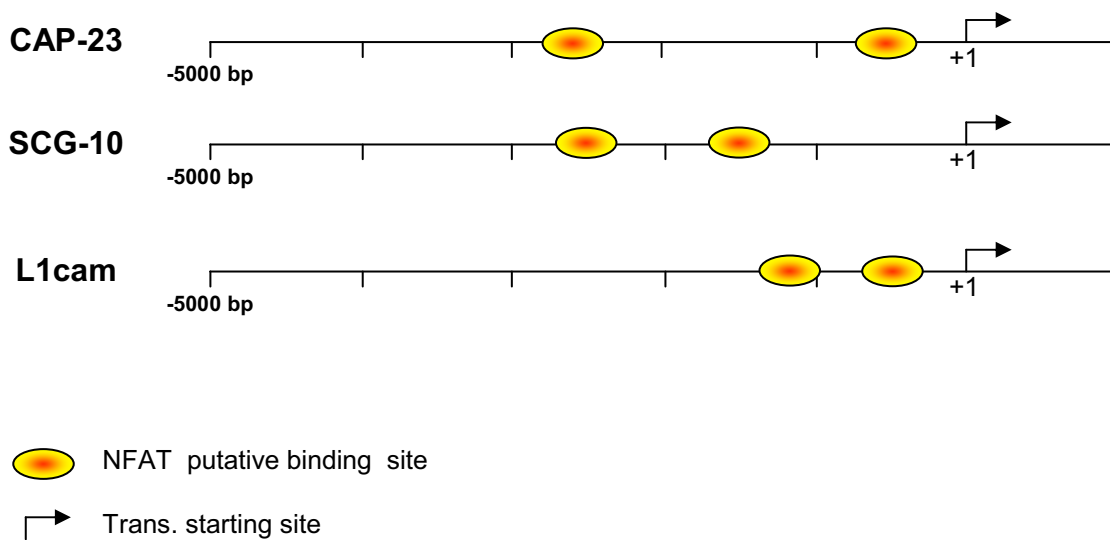

B

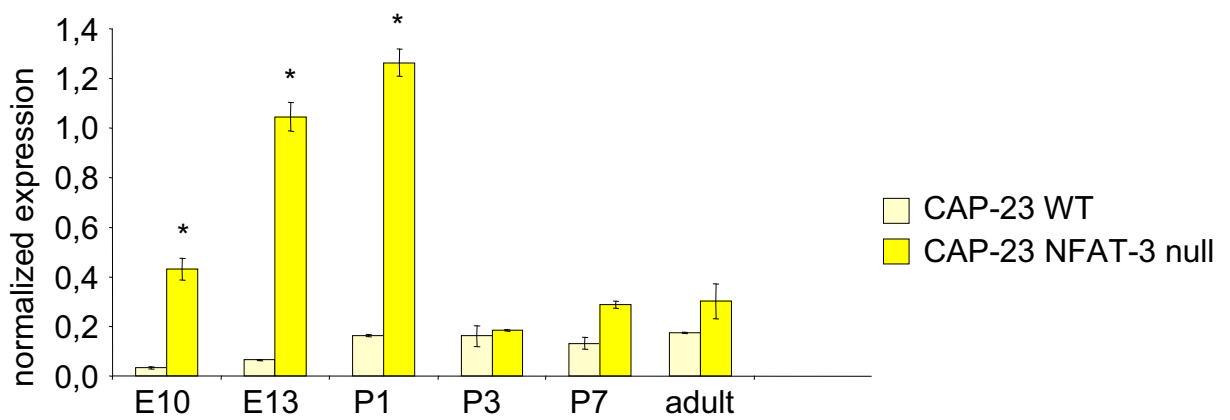

C

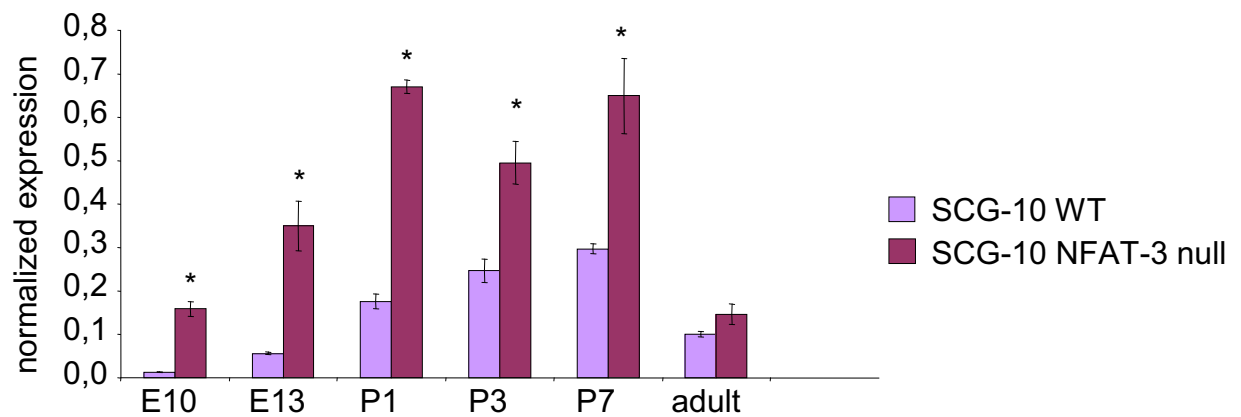

# Supplementary Figure 1

D

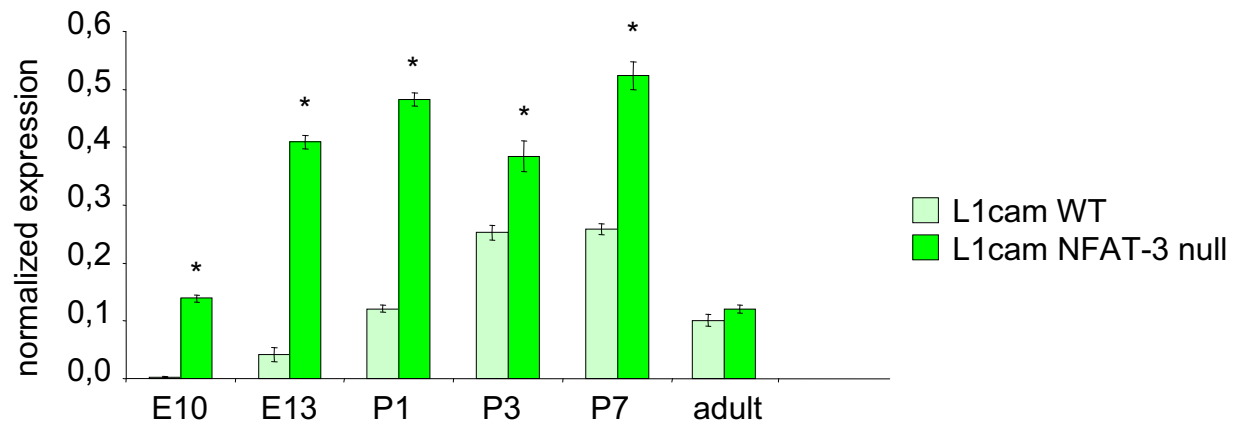

Supplement: supp_M109.015719_Supp.pdf [file supp_M109.015719_Supp.pdf]
